# Supplementary material
Source: PubMed Central journal article supplement (PMC4527948)
Supplement: NIHMS697803-supplement-1.pdf [file NIHMS697803-supplement-1.pdf]

## Supplementary Figure 1

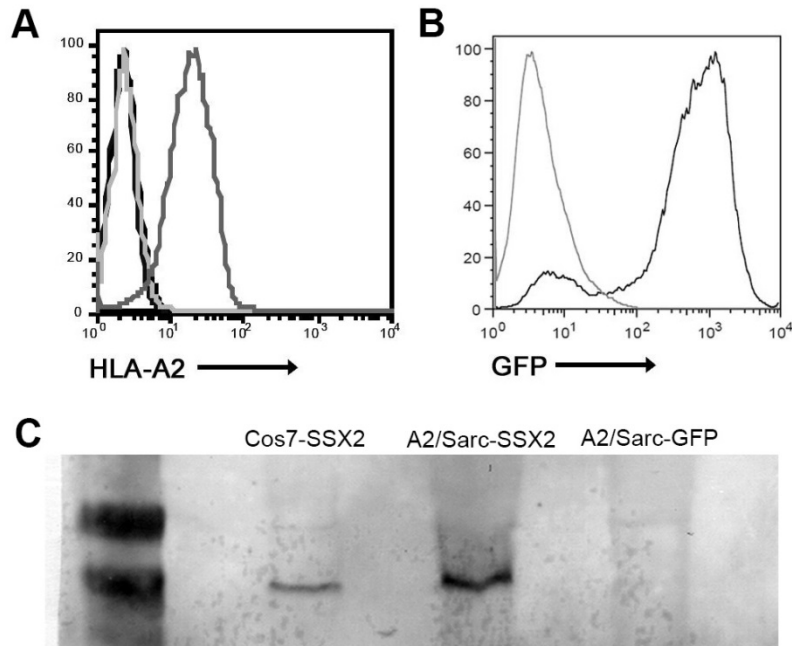

*HLA-A2/DR1 sarcoma (A2/Sarcoma) cell line transfected to express either GFP or SSX2.*

Panel A – A2/Sarcoma cell lines isolated from MCA-treated HHDII-DR1 mice were treated with IFN $\gamma$  for 2 days, and then stained for expression of HLA-ABC (dark grey), H-2K<sup>b</sup> (light grey), or control Ig (black). Panel B – SSX2- (light grey) or GFP-transfected (black) analyzed via flow cytometry for GFP expression. Panel C – Western blot for SSX2 expression from Cos7 cells transfected with pTVG-SSX2 (positive control), and A2/Sarcoma-SSX2 and –GFP cells.

## Supplementary Figure 2

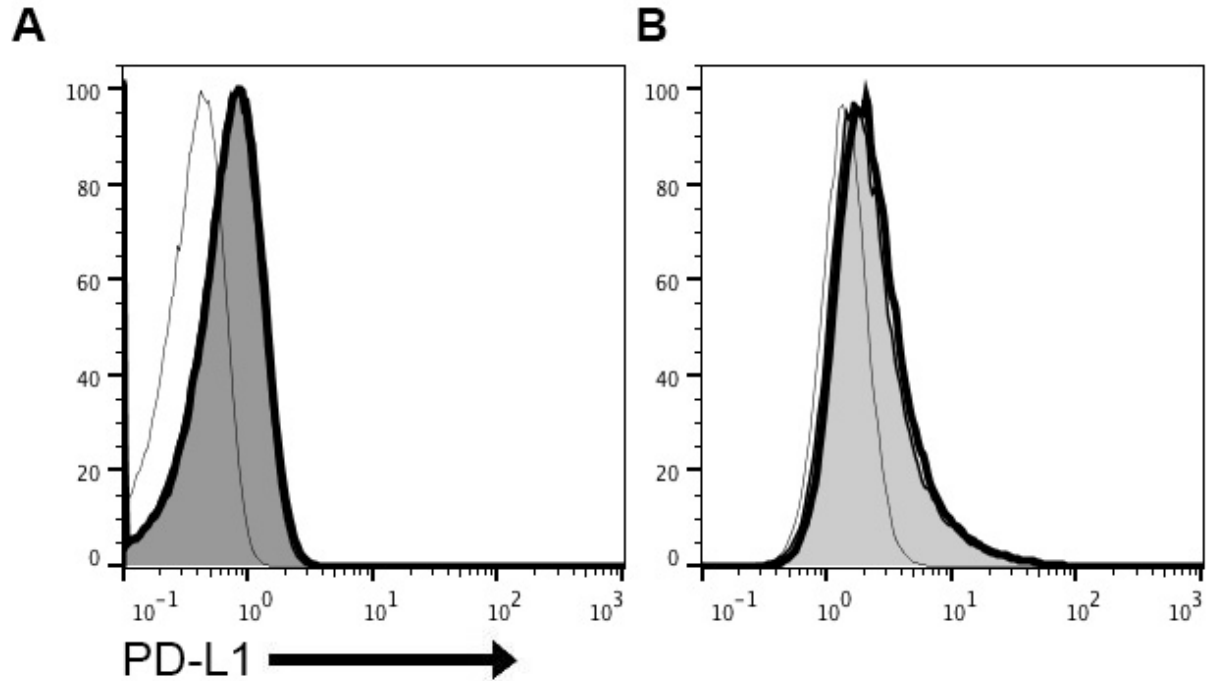

*T2 and LNCaP cells do not upregulate levels of PD-L1 expression when cultured with recombinant IFN $\gamma$ .*

T2 (Panel A) and LNCaP cells (Panel B) were grown for 18 hours in the presence of 1  $\mu\text{g}/\text{mL}$  recombinant IFN $\gamma$ , collected, and analyzed for PD-L1 expression using flow cytometry. IgG (light line), unstimulated (dark line), or stimulated (filled) histograms for PD-L1 expression on live-gated cells are shown.

### Supplementary Figure 3

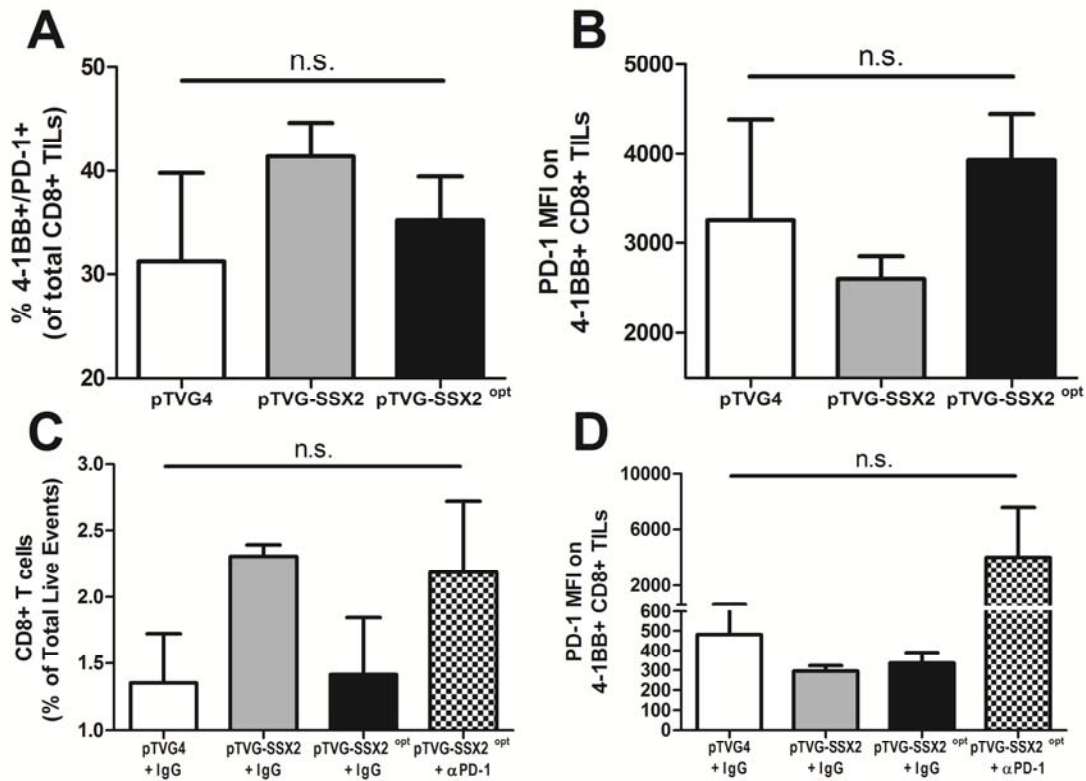

#### *Tumor infiltrating CD8+ T cells express detectable levels of PD-1 by flow cytometry*

A2/Sarcoma-SSX2  $\Delta$ PD-L1 tumors corresponding to the studies shown in Figure 3 (panels A and B), or native A2/Sarcoma-SSX2 tumors corresponding to the studies shown in Figure 5 (panels C and D) were digested and stained for CD8+, PD-1, and 4-1BB (activation marker) and analyzed via flow cytometry. Panel A shows the % of 4-1BB+/PD-1+ CD8+ T cells among total CD8+ TIL, whereas Panel C shows the frequency of CD8+ TIL (%CD8+ cells of total live events). Panels B and D show the PD-1 mean fluorescence intensity (MFI) for all 4-1BB+ CD8+ TILs. Groups were analyzed with a one-way ANOVA test.
